# Supplementary material for: EMT and cell cycle control invadopodia and metastasis in breast cancer via Filip1L
Source: Research Square preprint supplement (doi:10.21203/rs.3.rs-9349300/v1), 2026-04-19
Supplement: Supplementary file 1 [file a2e094a1f1852a75828c8077.pdf]

## Supplementary Materials

### **EMT and cell cycle control invadopodia and metastasis in breast cancer via Filip1L**

Elizaveta Belova<sup>1</sup>, Afroz Jarrah<sup>1</sup>, Gleb Abalakov<sup>1</sup>, Adam L Karami<sup>2</sup>, Bojana Gligorijevic<sup>\*1,2,3</sup>

#### Affiliations

<sup>1</sup> Bioengineering Department, Temple University, Philadelphia, PA 19122, USA

<sup>2</sup> Fels Cancer Institute for Personalized Medicine, Lewis Katz School of Medicine, Temple University, Philadelphia, PA 19140, USA

<sup>3</sup> Cancer Signaling and Microenvironment Program, Fox Chase Cancer Center, Philadelphia, PA 19111 USA

\*Correspondence: Bojana Gligorijevic, [bojana.gligorijevic@temple.edu](mailto:bojana.gligorijevic@temple.edu)

## Supplementary Figures

### **Supplementary Figure 1. Induced overexpression of Slug leads to increases in invadopodia-mediated ECM degradation and in the number of G1 cells.**

- A.** Binarized images of invadopodia degradation (black puncta) in 4T1-FUCCI-TetOn-Slug cells cultured on fluorescent gelatin for 16 h, synchronized with DMSO, Lov, or MitC. Prior to plating on gelatin, cells were exposed to -Dox or +Dox for 3 days. Nuclei were stained with DRAQ5 (magenta). Scale bar, 20  $\mu$ m.
- B.** Fluorescence overlay images of 4T1-FUCCI-TetOn-Slug cells in G1 (red) and G2 (green), imaged on day 3 after addition of doxycycline. Scale bar, 100  $\mu$ m.
- C.** Quantification of cell cycle distribution in -Dox d3 and +Dox d3 cells from panel B. Data represent mean  $\pm$  SD. N=3, n=3, 9 FOVs per n per condition. Data for G1 and G2 cells have passed Shapiro-Wilk test for Gaussian distribution. Statistical significance was determined using unpaired two-tailed t-test; G1 cells (-Dox d3 vs +Dox d3): P = 0.0036. G2 cells (-Dox d3 vs +Dox d3): P = 0.0034. Mann-Whitney test was used for Early S (-Dox d3 vs +Dox d3): P = 0.2084, ns.

### **Supplementary Figure 2. MCF10A cells transition from E to early E/M when treated with TGF $\beta$ 1.**

- A.** Cell transition from E to early E/M upon TGF $\beta$ 1 treatment. Created in BioRender.
- B.** Fluorescent gelatin layer (left) and corresponding phase-contrast images of MCF10A cells, with or without TGF $\beta$ 1 treatment, and with lovastatin-driven synchronization to G1 phase. Scale bar, 50  $\mu$ m.
- C.** Quantification of matrix degradation area per cell corresponding to (B). Dotted lines represent quartiles; the dashed line represents the median. Statistical significance was determined using the unpaired Mann-Whitney test. \*\*\*P < 0.001; \*\*\*\*P < 0.0001. N=2, n=1, 9-10 FOVs per n per condition.
- D.** Western blot analysis of E and M marker expression in MCF10A cells before and after TGF $\beta$ 1 treatment.

### **Supplementary Figure 3. Differential expression of matrix remodeling genes across cell cycle phases in early- and late E/M states.**

- A.** Heatmap showing the relative expression levels of statistically significant matrix remodeling and invadopodia-related genes in early E/M cells, G1 versus G2 cell cycle phases.
- B.** Heatmap showing the relative expression levels of statistically significant matrix remodeling and invadopodia-related genes in late E/M cells, G1 versus G2 cell cycle phases. The color scale represents Z-score normalized expression values across conditions.

### **Supplementary Figure 4. Differential expression of matrix remodeling genes between early- and late E/M cells in the same cell cycle phases.**

- A.** Heatmap showing the relative expression levels of statistically significant matrix remodeling and invadopodia-related genes in G1 phase: early- vs late E/M cells.
- B.** Heatmap showing the relative expression levels of statistically significant matrix remodeling and invadopodia-related genes in G2 phase: early- vs late E/M cells. The color scale represents Z-score normalized expression values across conditions.

**Supplementary Figure 5. High FILIP1L expression is associated with increased expression of ECM-degrading proteases.**

**A-F.** Violin plots showing log<sub>2</sub> mRNA expression of MMPs (**a-b**), invadopodia components (**c**), ADAMs (**d**), ADAM, ADAMEC and ADAMTS family proteases (**e-f**) in breast cancer patient samples stratified by FILIP1L expression (low: Group A, blue; high: Group B, pink). Data was retrieved from publicly available breast cancer TCGA PanCancer Atlas dataset. Dotted lines represent quartiles; the dashed line represents the median. Significance was determined using the unpaired Mann-Whitney test. P values:  $P > 0.05$  (ns),  $P < 0.05$  (\*),  $P < 0.01$  (\*\*),  $P < 0.001$  (\*\*\*),  $P < 0.0001$  (\*\*\*\*).

**Supplementary Figure 6. FILIP1L colocalizes with Tks5 and cortactin in MDA-MB-231 cells**

- A.** In MDA-MB-231 cells labeled by DAPI (blue), Tks5 (green) and FILIP1L (red), white arrows point to invadopodia. Line (magenta) was drawn through one of the invadopodia punctae. Right panel: Profile of FILIP1L (red) and Tks5 (green) intensities along the magenta line. Scale bar: 20  $\mu$ m.
- B.** In MDA-MB-231 cells labeled by DAPI (blue), cortactin (green) and FILIP1L (red), white arrows point to invadopodia. Line (magenta) was drawn through one of the invadopodia punctae. Right panel: Profile of FILIP1L (red) and cortactin (green) intensities along the magenta line. Scale bar: 20  $\mu$ m.

Supplementary Tables

**Supplementary Table 1. DESeq2 design setup**

**Supplementary Table 2. Result of Multivariate DESeq2 analysis**

**Supplementary Table 3. Materials for immunofluorescence**

**Supplementary Table 4. Materials for Western blots**

Supplementary Figure 1.

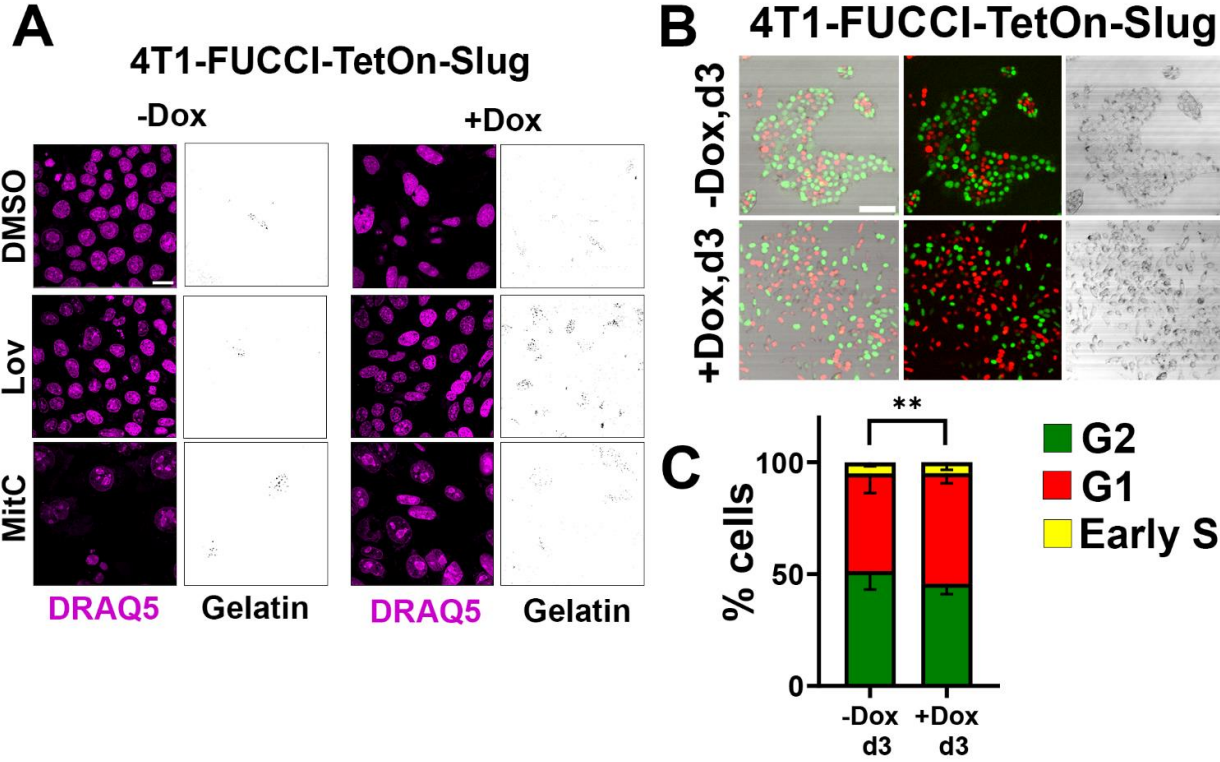

Supplementary Figure 2.

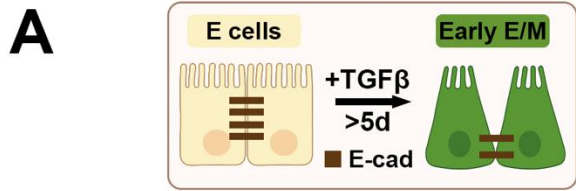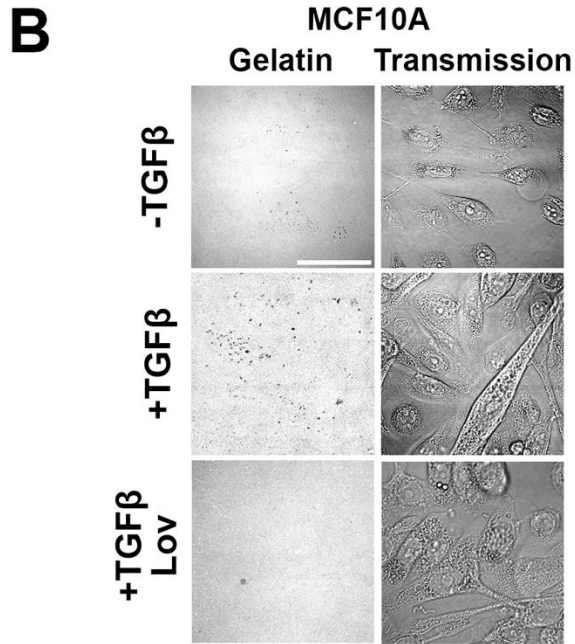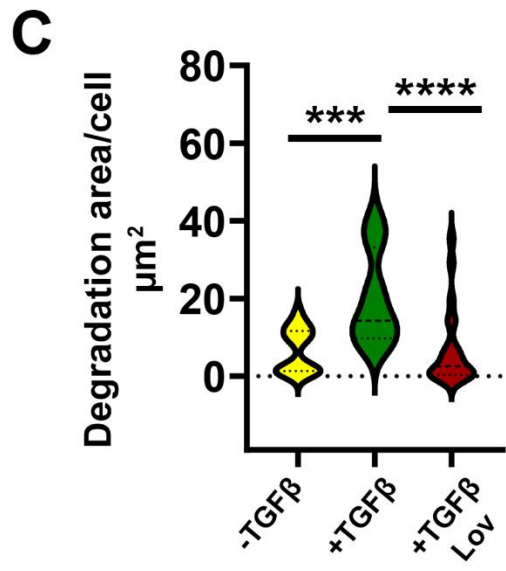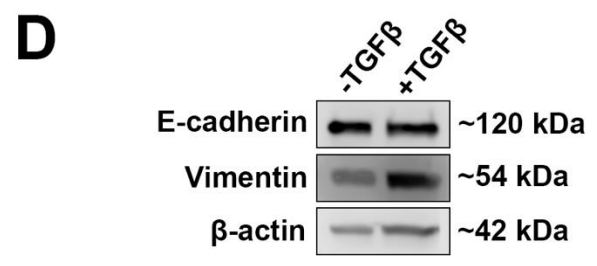



Supplementary Figure 4.

**A**  
Early E/M G1 vs Late E/M G1

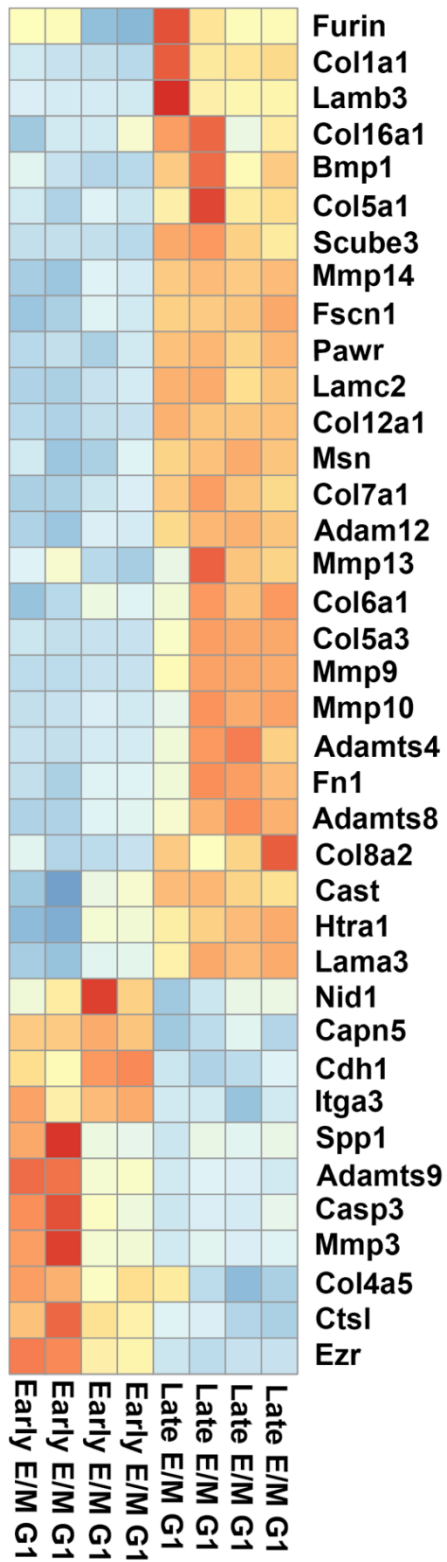

**B**  
Early E/M G2 vs Late E/M G2

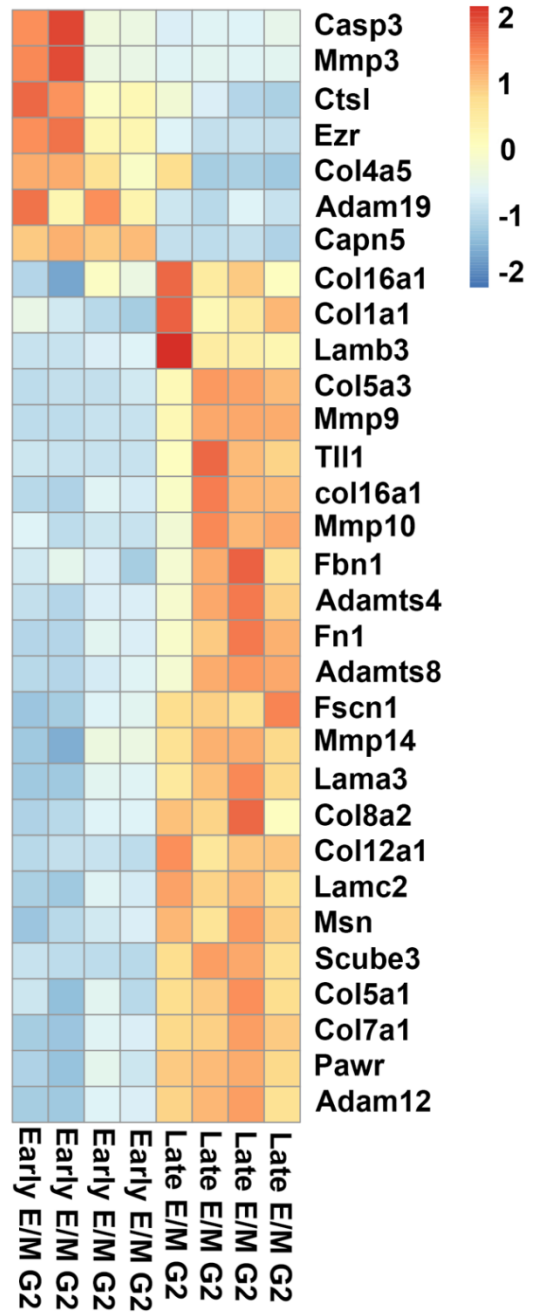

Supplementary Figure 5.

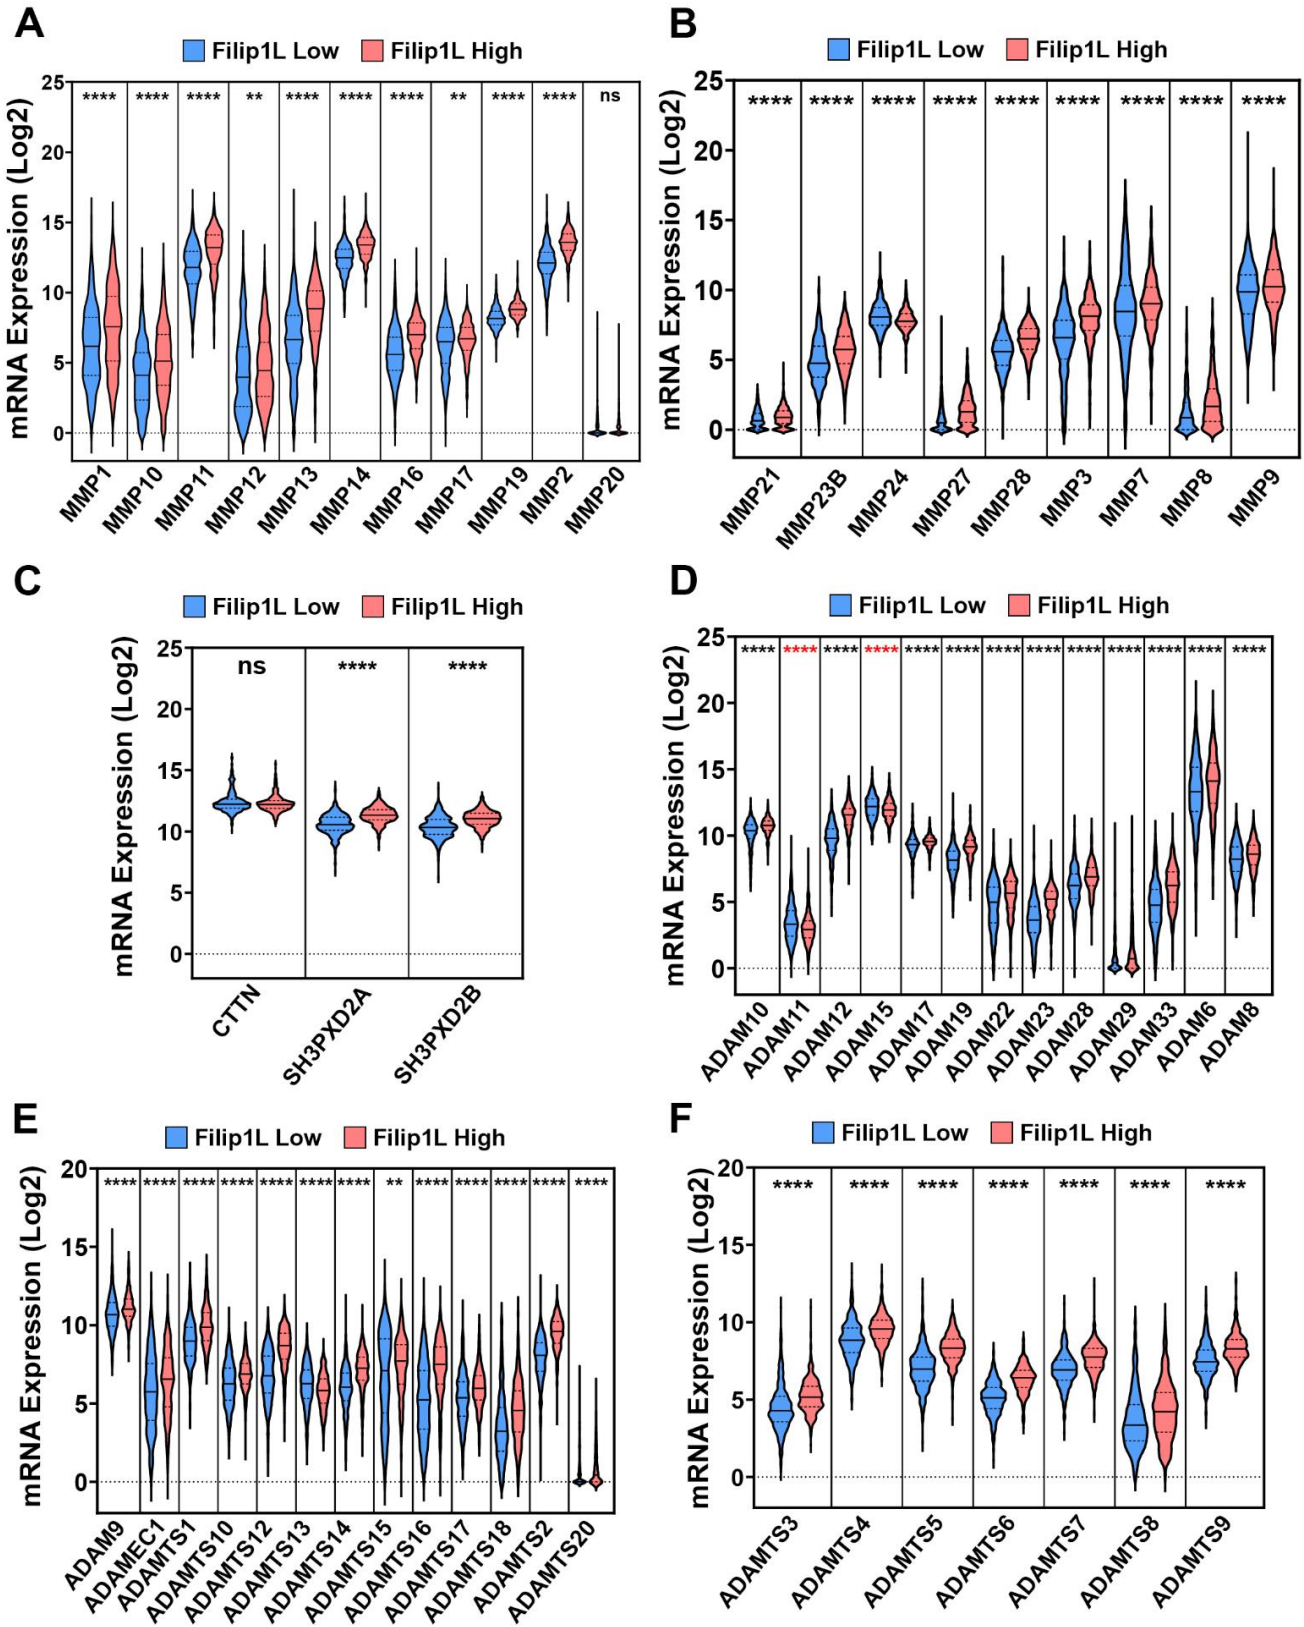

Supplementary Figure 6.

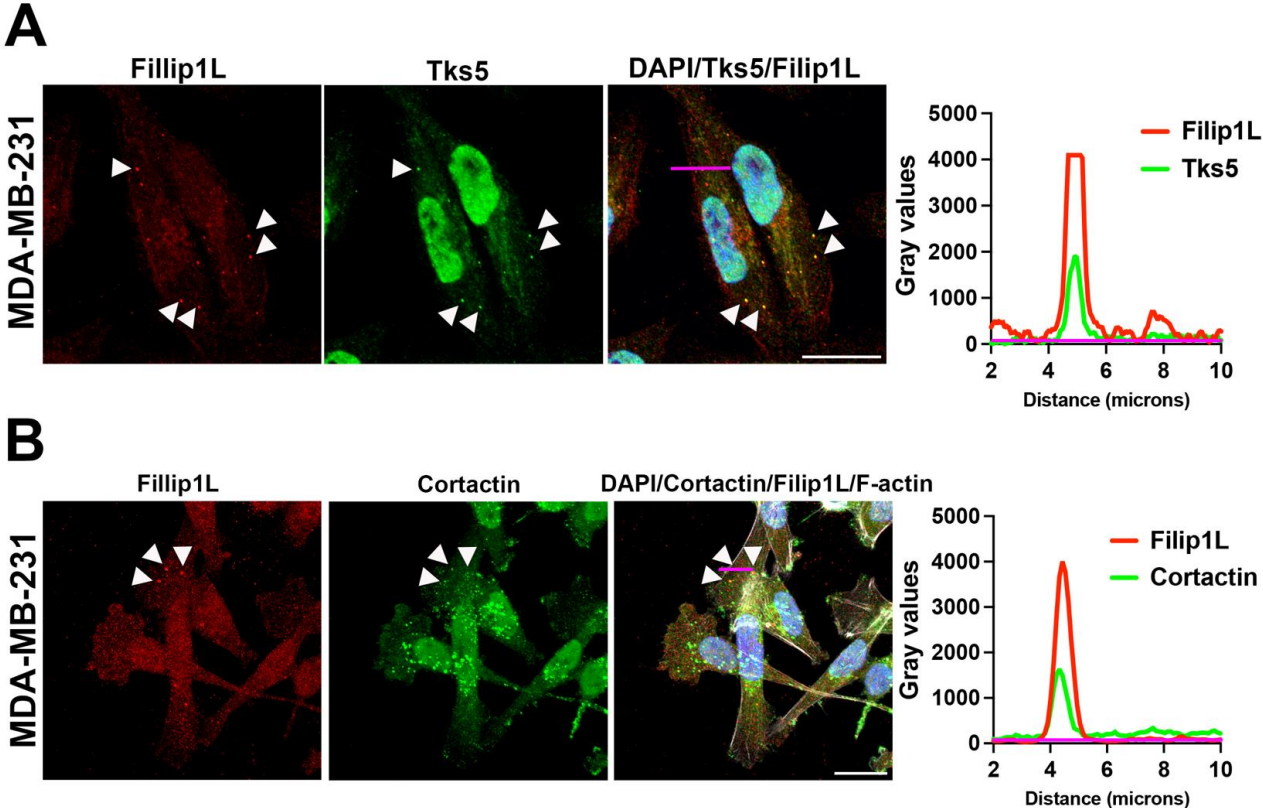

**Supplementary Table 1. DESeq2 design setup**

| <b>Samples</b>  | <b>Treatment</b>      | <b>Cell cycle phase</b> | <b>Treatment_color</b> | <b>Invasiveness</b> |
|-----------------|-----------------------|-------------------------|------------------------|---------------------|
| Early E/M G2 #1 | -TGF $\beta$ -1 (Ctl) | G2 (Green)              | Ctl_G                  | Invasive            |
| Early E/M G1 #1 |                       | G1 (Red)                | Ctl_R                  | Noninvasive         |
| Early E/M G2 #2 |                       | G2 (G)                  | Ctl_G                  | Invasive            |
| Early E/M G1 #2 |                       | G1 (R)                  | Ctl_R                  | Noninvasive         |
| Early E/M G2 #3 |                       | G2 (G)                  | Ctl_G                  | Invasive            |
| Early E/M G1 #3 |                       | G1 (R)                  | Ctl_R                  | Noninvasive         |
| Early E/M G2 #4 |                       | G2 (G)                  | Ctl_G                  | Invasive            |
| Early E/M G1 #4 |                       | G1 (R)                  | Ctl_R                  | Noninvasive         |
| Late E/M G2 #1  | +TGF $\beta$ -1       | G2 (G)                  | Growth_G               | Noninvasive         |
| Late E/M G1 #1  |                       | G1 (R)                  | Growth_R               | Invasive            |
| Late E/M G2 #2  |                       | G2 (G)                  | Growth_G               | Noninvasive         |
| Late E/M G1 #2  |                       | G1 (R)                  | Growth_R               | Invasive            |
| Late E/M G2 #3  |                       | G2 (G)                  | Growth_G               | Noninvasive         |
| Late E/M G1 #3  |                       | G1 (R)                  | Growth_R               | Invasive            |
| Late E/M G2 #4  |                       | G2 (G)                  | Growth_G               | Noninvasive         |
| Late E/M G1 #4  |                       | G1 (R)                  | Growth_R               | Invasive            |

**Supplementary Table 2. Result of Multivariate DESeq2 analysis**

| <b>Gene ID</b>     | <b>baseMean</b> | <b>lo G2<br/>FoldChange</b> | <b>p-value</b> | <b>padj</b> | <b>Symbol</b> |
|--------------------|-----------------|-----------------------------|----------------|-------------|---------------|
| ENSMUSG00000020897 | 2090.73         | -0.304                      | 5.20E-08       | 0.0013      | Aurkb         |
| ENSMUSG00000043336 | 1743.81         | 0.278                       | 1.47E-07       | 0.0018      | FILIP1L       |

**Supplementary Table 3. Materials for immunofluorescence**

| <b>Antibody and dyes</b> | <b>Cat. no</b>                      | <b>Dilution</b> |
|--------------------------|-------------------------------------|-----------------|
| Anti-Tks5                | Millipore, MABT336                  | 1:200           |
| Anti-E-cadherin          | Thermo Fisher Scientific, 131900    | 1:200           |
| Anti-FILIP1L             | Abcam, ab151331                     | 1:200           |
| Vimentin                 | Abcam, ab92547                      | 1:200           |
| Phalloidin               | Life Technologies<br>A22283, A22284 | 1:250           |

**Supplementary Table 4. Materials for Western blots**

| <b>I Antibody</b>                                                 | <b>Cat. #</b>                                | <b>Host</b> | <b>I Antibody Dilution</b> | <b>II Antibody Dilution</b> | <b>µg of protein/lane</b> | <b>Chemiluminescent reagent</b> |
|-------------------------------------------------------------------|----------------------------------------------|-------------|----------------------------|-----------------------------|---------------------------|---------------------------------|
| Vimentin                                                          | Abcam,<br>ab92547                            | Rabbit      | 1:1000                     | 1:4000                      | 10                        | WesternBright                   |
| FILIP1L                                                           | Abcam,<br>ab151331                           | Rabbit      | 1:1000                     | 1:4000                      | 10                        | WesternBright                   |
| FILIP1L<br>Thermo                                                 | PA5-60251                                    | Rabbit      | 1:1000                     | 1:5000                      | 25                        | WesternBright                   |
| Slug<br>(C19G7)                                                   | Cell<br>Signaling<br>Technology<br><br>9585T | Rabbit      | 1:1000                     | 1:5000                      | 20                        | WesternBright                   |
| E-cadherin<br>BD                                                  | BD<br>Biosciences,<br>610181                 | Mouse       | 1:1000                     | 1:4000                      | 10                        | WesternBright                   |
| β-actin<br>Loading<br>Control<br>Monoclonal<br>Antibody<br>(BA3R) | Thermo<br>Scientific<br><br>MA5-15739        | Mouse       | 1:1000                     | 1:5000                      | 10                        | WesternBright                   |
| ZO1                                                               | Thermo<br>Fisher,<br>21773-1-AP              | Rabbit      | 1:1000                     | 1:5000                      | 10                        | WesternBright                   |
| Tks5                                                              | MABT336                                      | Mouse       | 1:100                      | 1:5000                      | 10                        | Supersignal                     |
| Twist1                                                            | Sigma,<br>T6451-25UL                         | Rabbit      | 1:1000                     | 1:4000                      | 10                        | Super signal                    |
